# Supplementary material
Source: PubMed Central journal article supplement (PMC3753887)

Supplemental Figure 1

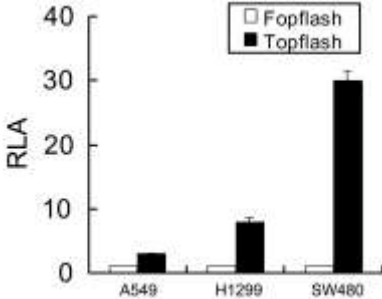

Supplemental Figure 2

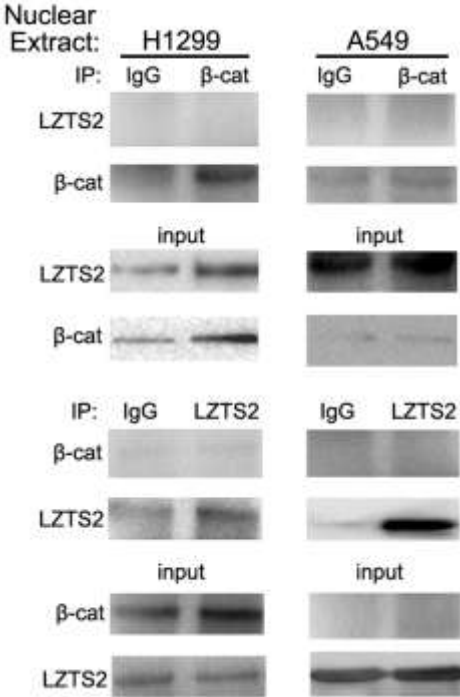

Supplement: supp_0022155413495875_10.1369_0022155413495875_suppl.pdf [file supp_0022155413495875_10.1369_0022155413495875_suppl.pdf]
